# Supplementary material
Source: Springer Nature journal article supplement (https://www.springermedizin.de/resource/supplementary/12876_2012_816_MOESM1_ESM.pdf/9437446)

core 18-27

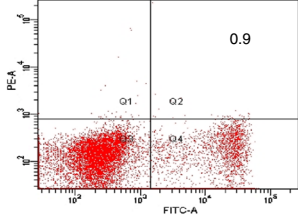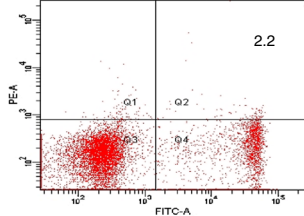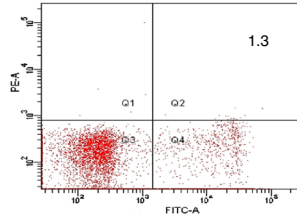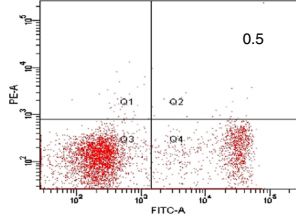

env 335-343

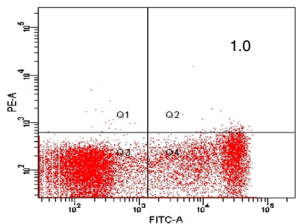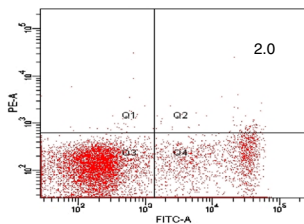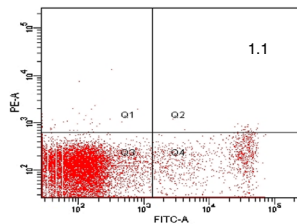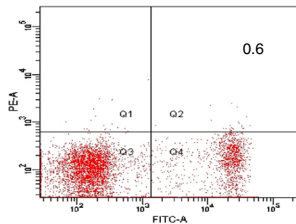

pol 575-583

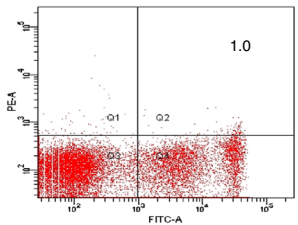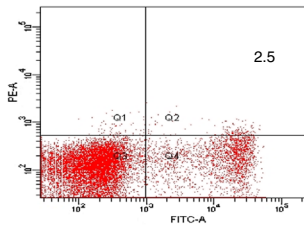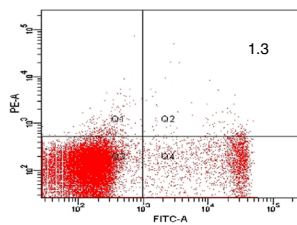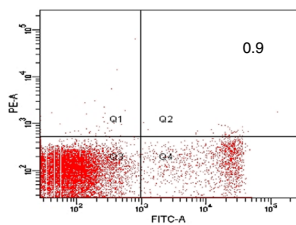

T1 period

T2 period

T3 period

T4 period

Supplement: MOESM1 [file 9437446]
